# Supplementary material
Source: PubMed Central journal article supplement (PMC4758344)
Supplement: NIHMS747077-supplement-Supplement.pdf [file NIHMS747077-supplement-Supplement.pdf]

**Supporting Information:**

**Cerium oxide nanoparticles attenuate monocrotaline induced right ventricular hypertrophy  
following pulmonary arterial hypertension**

\*Madhukar B. Kolli<sup>1,2</sup>, \*Nandini D.P.K. Manne<sup>1,2</sup>, Radhakrishna Para<sup>2</sup>, Siva K. Nalabotu<sup>1,2</sup>, Geeta Nandyala<sup>2</sup>, Tolou Shokuhfar<sup>6</sup>, Kun He<sup>6,7</sup>, Azhang Hamlekhan<sup>6</sup>, Ma J.Y<sup>4</sup>, Paulette S. Wehner<sup>3</sup>, Lucy Dornon<sup>3</sup>, Ravikumar Arvapalli<sup>2</sup>, Kevin M. Rice<sup>2</sup>, and Eric R. Blough<sup>1,2,5</sup>

<sup>1</sup>Department of Pharmacology, Physiology and Toxicology, Marshall University,  
Joan C. Edwards School of Medicine

<sup>2</sup>Center for Diagnostic Nanosystems, Marshall University, Huntington, WV, United  
States

<sup>3</sup>Department of Cardiology, Joan C. Edwards School of Medicine, Marshall University,  
Huntington, WV

<sup>4</sup>Health Effects Laboratory Division, NIOSH, Morgantown, WV

<sup>5</sup>Department of Pharmaceutical Sciences and Research, Marshall University

<sup>6</sup>Department of Mechanical Engineering and Engineering Mechanics, Michigan Technological  
University, Houghton, MI, USA.

<sup>7</sup>School of Materials Science and Engineering, Shandong University, Ji'nan, China

\* Authors contributed equally

Author for correspondence:

Eric Blough

Center for Diagnostic Nanosystems

Room 241R, Robert C. Byrd Biotechnology Science Center Building

Department of Pharmaceutical Science and Research

1700 3<sup>rd</sup> Ave.

Marshall University

Huntington, WV 25755-1090

E-mail: [blough@marshall.edu](mailto:blough@marshall.edu)

Ph.No- 304-696-2708

Fax No- 304-696-3766

SUPPLEMENTAL MATERIAL

Supplementary Figure 1

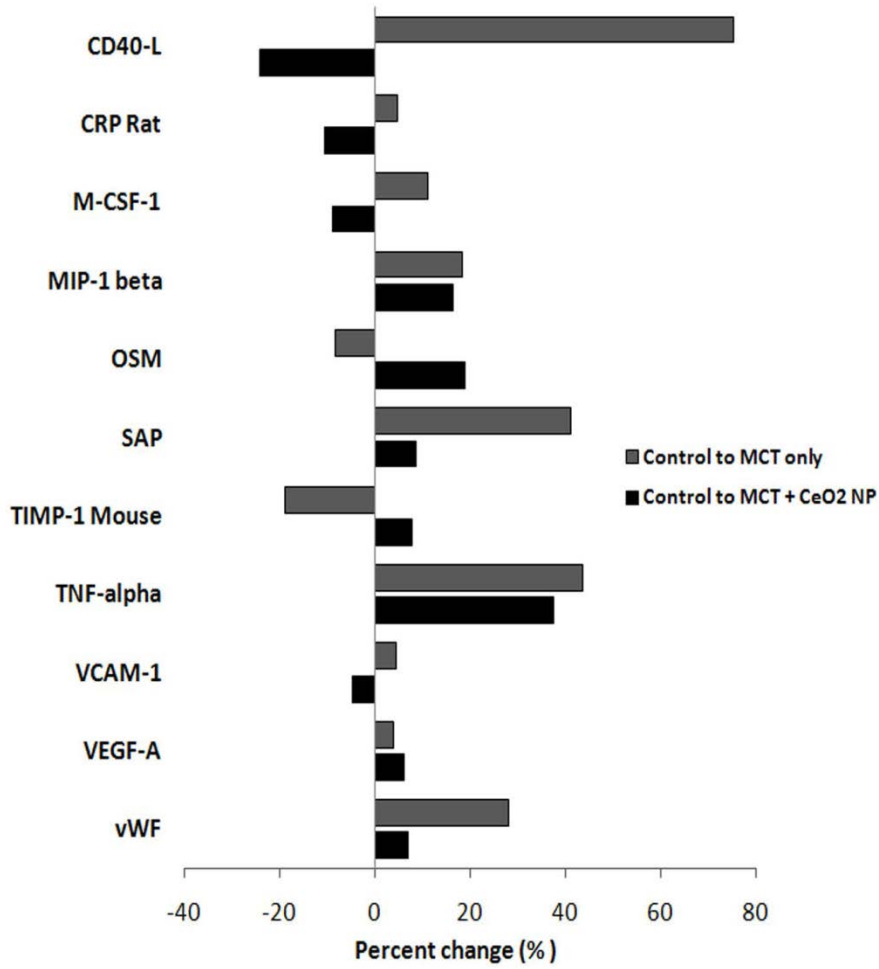

Supplementary Figure 1. Cerium oxide nanoparticles attenuate monocrotaline-induced serum inflammatory proteins.
